# Supplementary material for: Dimensionally stable multication-crosslinked poly(arylene piperidinium) membranes for water electrolysis
Source: Royal Society of Chemistry journal article supplement (doi:10.1039/d1ta10820d), 2022-01-01
Supplement: d1ta10820d1.pdf [file d1ta10820d1.pdf]

Supplementary Information

**Dimensional stable multication-crosslinked poly(arylene  
piperidinium) membranes for water electrolysis**

*Xiuqin Wang and Rob G. H. Lammertink*

*Soft Matter, Fluidics and Interfaces, Faculty of Science and Technology, MESA+ Institute for  
Nanotechnology, University of Twente, Enschede, 7522 NB, The Netherlands*

**Author information :**

*Corresponding author: Rob G. H. Lammertink*

*Fax: (+31)534-894-611*

*E-mail: [R.G.H.Lammertink@utwente.nl](mailto:R.G.H.Lammertink@utwente.nl)*

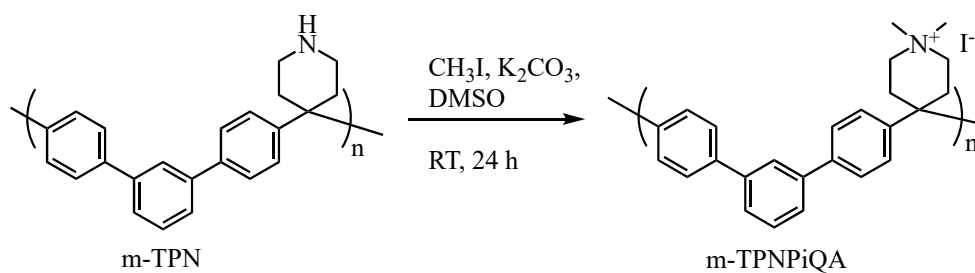

Scheme S1 Quaternization route for m-TPNPiQA.

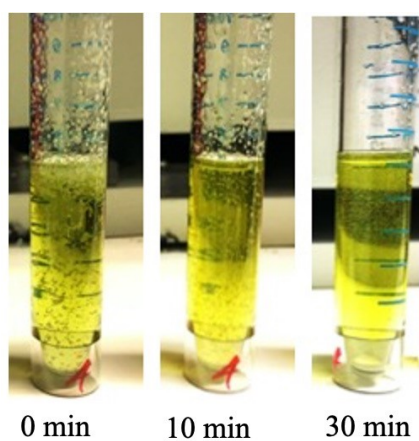

Fig. S1 Changes after adding DIPEI catalyst into the casting solution.

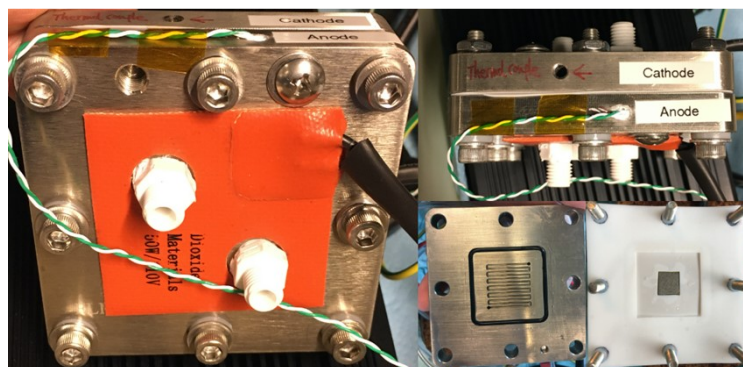

Fig. S2 The digital photos of an AEMWE cell.

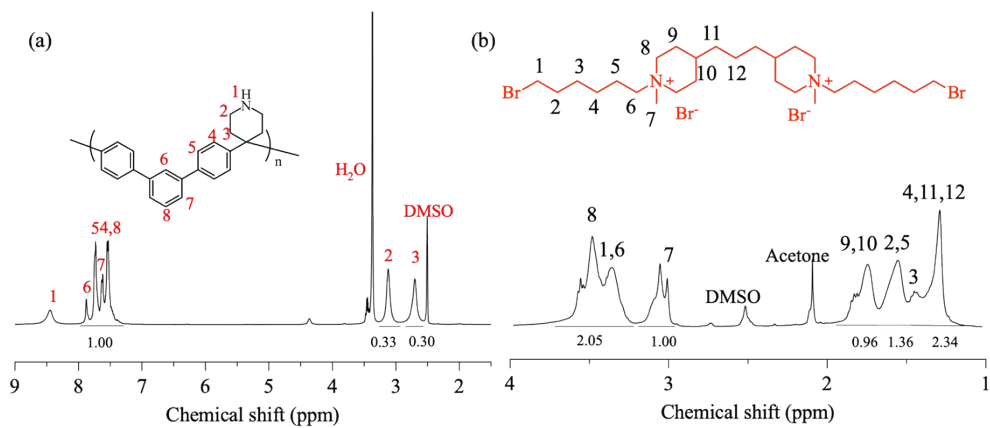

Fig. S3  $^1\text{H-NMR}$  spectra of (a) m-TPN and (b) IL.

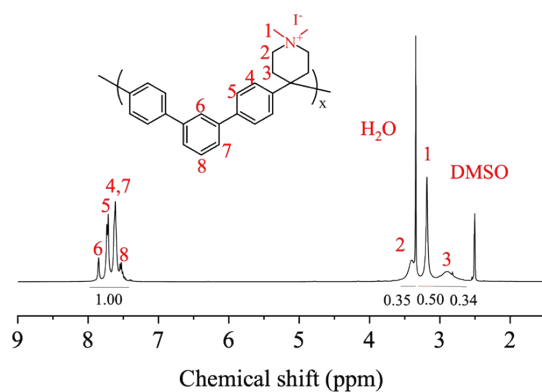

Fig. S4  $^1\text{H-NMR}$  spectrum of m-TPNPiQA.

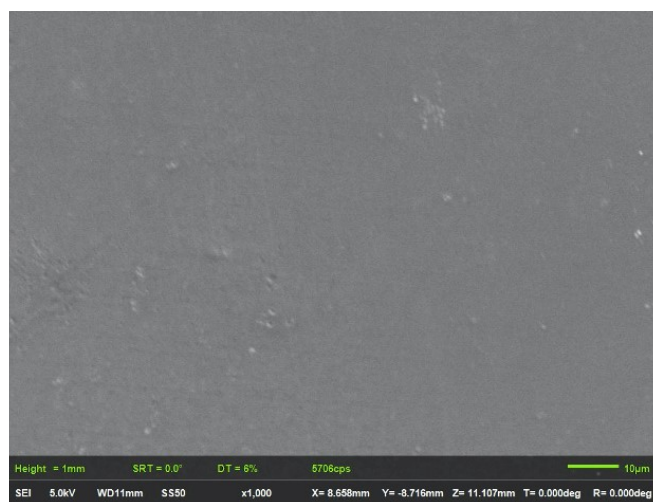

Fig. S5 SEM image of the C-IL-100 membrane.

Table S1 Mechanical properties of m-TPNPiQA and crosslinked C-IL-x membranes in the wet state.

| Samples   | Young's modulus<br>(MPa) | Elongation at break<br>(%) | Tensile strength<br>(MPa) |
|-----------|--------------------------|----------------------------|---------------------------|
| m-TPNPiQA | 646.67                   | 8.94                       | 21.05                     |
| C-IL-20   | 781.49                   | 14.70                      | 49.77                     |
| C-IL-40   | 729.78                   | 16.33                      | 39.34                     |
| C-IL-60   | 563.65                   | 17.74                      | 31.94                     |
| C-IL-80   | 382.57                   | 19.13                      | 24.30                     |
| C-IL-100  | 275.79                   | 25.25                      | 22.91                     |

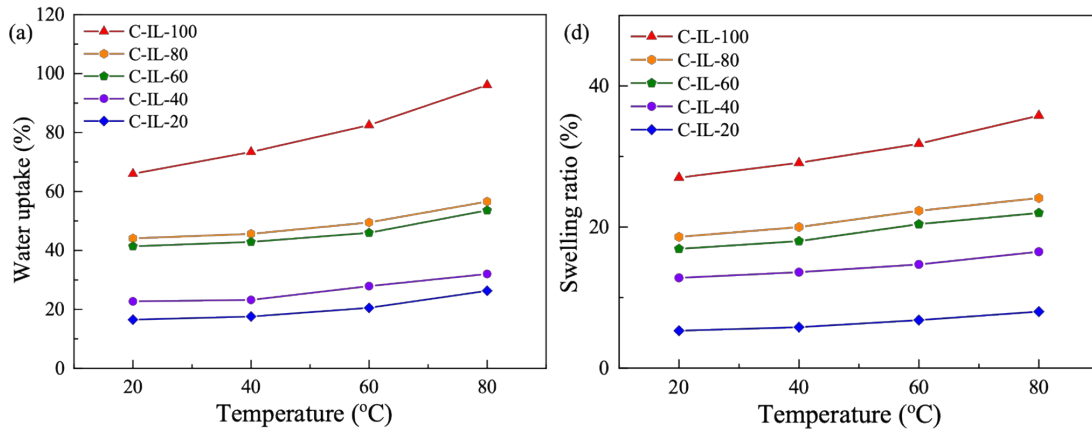

Fig. S6 (a) Water uptake and (b) swelling ratio of the crosslinked C-IL-x AEMs as a function of temperature.

Table S2 Water electrolysis performance of C-IL-100 and m-TPNPiQA membranes.

| Samples   | Temperature (°C) | Current density @ 2.0V(A cm <sup>-2</sup> ) |
|-----------|------------------|---------------------------------------------|
| C-IL-100  | RT               | 0.31                                        |
|           | 50 °C            | 0.42                                        |
|           | 80 °C            | 0.55                                        |
| m-TPNPiQA | RT               | 0.11                                        |
|           | 50 °C            | 0.18                                        |
|           | 80 °C            | 0.25                                        |

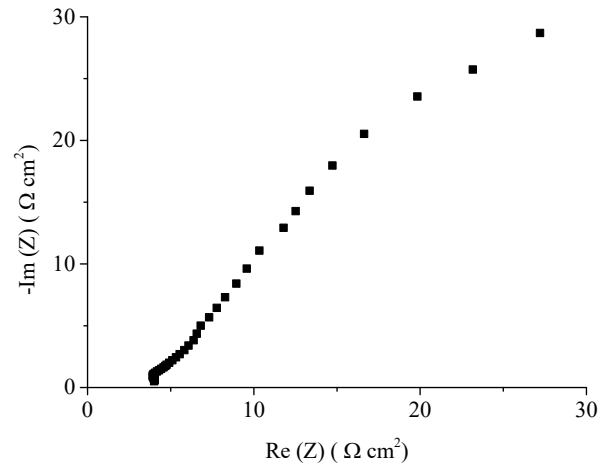

Fig. S7 Impedance data of m-TPNPIQA-based AEMWE at 50 °C and 1.5 V.

Table S3 Performance comparison of alkaline water electrolyzer using 1 M KOH electrolyte and Ni-based catalysts.

| Name                   | Anode                                                                 | Cathode                                 | Temperature   | Current density<br>(mA cm <sup>-2</sup> ) /Voltage | Reference |
|------------------------|-----------------------------------------------------------------------|-----------------------------------------|---------------|----------------------------------------------------|-----------|
| C-IL-100               | NiFe <sub>2</sub> O <sub>4</sub> /Stainless-Steel <sup>a</sup>        | NiFeCO /Nickel Fiber Paper <sup>a</sup> | 50 °C         | 400/2V                                             | This work |
| m-TPNPiQA              | NiFe <sub>2</sub> O <sub>4</sub> /Stainless-Steel <sup>a</sup>        | NiFeCO /Nickel Fiber Paper <sup>a</sup> | 50 °C         | 180/2V                                             | This work |
| FAS-50                 | NiFe <sub>2</sub> O <sub>4</sub> /316L<br>Sintered<br>Stainless Steel | NiFeCO /Sigracet<br>Carbon Paper        | 39BC<br>60 °C | 240/1.8V                                           | 1         |
| Sustainion 37-50       | NiFe                                                                  | NiFeCo                                  | 60 °C         | 1000/1.9V                                          | 2         |
| PBI/mTPN-50.120        | Ni-Fe/Ni Foam                                                         | MoNi/Ni Foam                            | 50 °C         | 250/1.98V                                          | 3         |
| PVBC-MPy/35% PEK-cardo | NiFe-LDH/Nickel Felt Paper                                            | MoNi/Nickel Felt Paper                  | 60 °C         | 500/2V                                             | 4         |

Reference:

1 Z. Liu, S. D. Sajjad, Y. Gao, H. Yang, J. J. Kaczur and R. I. Masel, *Int. J. Hydrogen Energy*, 2017, **42**, 29661-29665.

2 J. J. Kaczur, H. Yang, Z. Liu, S. D. Sajjad and R. I. Masel, *Front. Chem*, 2018, **6**, 263.

3 M. Najibah, E. Tsoy, H. Khalid, Y. Chen, Q. Li, C. Bae, J. Hnát, M. Plevová, K. Bouzek, J. H. Jang, H. S. Park and D. Henkensmeier, *J. Membr. Sci.*, 2021, **640**, 119832.

4 H. Li, M. R. Kraglund, A. K. Reumert, X. Ren, D. Aili and J. Yang, *J. Mater. Chem. A*, 2019, **7**, 17914-17922.
